Research Article

# Structural basis of the human Scribble–Vangl2 association in health and disease

Jing Yuan How<sup>1</sup>, Rebecca K. Stephens<sup>1</sup>, Krystle Y.B. Lim<sup>1</sup>, Patrick O. Humbert<sup>1,2,3,4</sup> and  Marc Kvsanakul<sup>1,2</sup>

<sup>1</sup>Department of Biochemistry and Genetics, La Trobe Institute for Molecular Science, La Trobe University, Melbourne, Victoria 3086, Australia; <sup>2</sup>Research Centre for Molecular Cancer Prevention, La Trobe University, Melbourne, Victoria 3086, Australia; <sup>3</sup>Department of Biochemistry and Molecular Biology, University of Melbourne, Melbourne, Victoria 3010, Australia; <sup>4</sup>Department of Clinical Pathology, University of Melbourne, Melbourne, Victoria 3010, Australia

**Correspondence:** Marc Kvsanakul (m.kvsanakul@latrobe.edu.au) or Patrick O. Humbert (p.humbert@latrobe.edu.au)

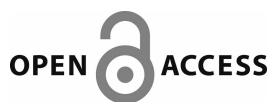

Scribble is a critical cell polarity regulator that has been shown to work as either an oncogene or tumor suppressor in a context dependent manner, and also impacts cell migration, tissue architecture and immunity. Mutations in Scribble lead to neural tube defects in mice and humans, which has been attributed to a loss of interaction with the planar cell polarity regulator Vangl2. We show that the Scribble PDZ domains 1, 2 and 3 are able to interact with the C-terminal PDZ binding motif of Vangl2 and have now determined crystal structures of these Scribble PDZ domains bound to the Vangl2 peptide. Mapping of mammalian neural tube defect mutations reveal that mutations located distal to the canonical PDZ domain ligand binding groove can not only ablate binding to Vangl2 but also disrupt binding to multiple other signaling regulators. Our findings suggest that PDZ-associated neural tube defect mutations in Scribble may not simply act in a Vangl2 dependent manner but as broad-spectrum loss of function mutants by disrupting the global Scribble-mediated interaction network.

## Introduction

The establishment of cell polarity, defined as the asymmetric distribution of proteins, carbohydrates and lipids within the cell, is a crucial process for the organization and development of all animal tissues [1]. In multicellular organisms, four major different types of polarity can be distinguished: apico-basal cell polarity, asymmetric cell division, front-rear cell polarity and planar cell polarity [2].

Planar cell polarity is a critical feature of the extension and axial elongation of tissues, establishing uniformly directional information through coordinating polarity across cells within the tissue plane [3]. In mammals, planar cell polarity is essential during embryonic developmental stages, where its dysregulation during this time results in the neural tube failing to close and subsequent congenital malformations, including spina bifida and craniorachischisis, a severe neural tube defect in which the midbrain, hindbrain and the entire spinal region remain open [4]. Planar cell polarity deregulation is further implicated in defects in wound closure, a process that requires coordination of multiple cells across a tissue to migrate and proliferate together, as well as the early stages of cancer [5].

The Scribble protein is a highly conserved cell polarity regulator comprising 16 Leucine-Rich Repeats and four PSD-95/Discs-large/ZO-1 (PDZ) domains and belongs to the LAP family of proteins [6,7]. Together with Discs Large (Dlg) and Lethal Giant Larvae (Lgl), Scribble acts to establish and maintain tissue homeostasis, as well as directed cell migration and tissue growth [8]. Whilst Scribble was originally characterized as a cell polarity regulator and tumor suppressor in the vinegar fly *Drosophila melanogaster* [9], its role in planar cell polarity was first identified in the mouse, where mutation to Scribble result in a severe, embryonic lethal form of neural tube defect known as craniorachischisis [10,11] (Reviewed in [12]). Importantly, Scribble mutations leading to neural tube defects have also been identified in humans, further highlighting its importance as a candidate gene to study planar cell polarity regulation and developmental defects [13,14].

Received: 15 October 2020  
 Revised: 24 February 2021  
 Accepted: 8 March 2021

Accepted Manuscript online:  
 8 March 2021  
 Version of Record published:  
 6 April 2021

Scribble modulates numerous cellular processes through its many protein–protein interactions, which are largely mediated by Scribble’s four PDZ domains [8]. These PDZ domains bind C-terminally located PDZ-binding motifs (PBMs) on specific interactors in a selective manner, whilst individual Scribble PDZ domains display overlapping specificities for particular ligands [8].

One such Scribble-interactor is Vangl2 (mammalian homolog of *Drosophila* Van Gogh), a transmembrane protein identified as a critical component of the planar cell polarity pathway [15]. Similarly to Scribble, Vangl2 is essential in early embryonic development where its loss leads to neural tube defects as well as disruption in the cochleae inner ear hair bundle orientation [10,16]. A number of mutations in human Vangl2 have also been shown to be associated to neural tube closure defects [17] with recent studies implicating disruption of planar cell polarity as the causative factor for these mutations [18]. Importantly, Vangl2 genetically interacts with Scribble to regulate planar cell polarity processes in the mouse [10,11,19,20]. Furthermore, Vangl2 has been shown to bind to Scribble PDZ domains both *in vivo* and *in vitro* [10,21,22] and its loss has been shown to lead to Vangl2 mislocalisation in mouse and zebrafish models [19,23]. Specifically, Vangl2 was shown to engage Scribble PDZ2 and 3 domains via a C-terminal PBM [21,22].

However, a more detailed molecular understanding of the relationship between Scribble and Vangl2 has been missing. We now report a systematic evaluation of Vangl2 PBM interactions with Scribble PDZ domains, together with structural analysis of all identified Scribble–Vangl2 interactions. Furthermore, using mutagenesis we biochemically interrogate the consequences of reported Scribble mutations associated with neural tube defects, thus providing a mechanistic basis to understand the interplay between Scribble and Vangl2 during the correct establishment of planar cell polarity as well as in a disease state such as during neural tube closure defects.

## Materials and methods

### Protein expression and purification

Recombinant human Scrib (Uniprot accession number: Q14160) domains spanning PDZ1 (728–815); PDZ2 (860–950); PDZ3 (1002–1094); PDZ4 (1099–1203)) as well as Scribble mutants were expressed using *Escherichia coli* BL21 (DE3) pLysS cells (BIOLINE) as Glutathione S-transferase or Maltose Binding Protein fusions [24] and purified as previously described [25]. Scribble PDZ domain mutants PDZ1 H793A, PDZ1 Q808H, PDZ1 E814G, PDZ2 R896A, PDZ2 H928A, PDZ3 P1043L and PDZ3 R1044Q were synthesized as codon-optimized synthetic cDNA and cloned in the pGEX-6P3 vector (Genscript). Mutant Scribble PDZ domains were expressed and purified as previously described [25].

### Isothermal titration calorimetry

Purified wild type and mutant human Scrib PDZ domains were used in isothermal titration experiments against 8-mer peptides spanning the C terminus of human Vangl2 (Uniprot accession number: Q9ULK5; RLQSETSV) or a non-binding mutant of Vangl2 (RLQSEASA) to determine the affinity for Scribble PDZ domains. Additional peptides used span the C terminus of beta-PIX [25] and APC [26] and were described previously. A synthetic pan-PDZ binding peptide referred to as superpeptide (RSWFETWV) was used as a positive control [27]. Titrations were performed at 25°C with a stirring speed of 750 rpm using the MicroCal™ iTC200 System (GE Healthcare). A total of 20 injections with 2 µl each and a spacing of 180 seconds were titrated into the 200 µl protein sample (25 mM Hepes pH 7.5, 150 mM NaCl), except for the first injection which was only 0.4 µl. Protein concentration of 75 µM against peptide concentration of 0.9 mM were used. Peptides were purchased from Genscript (San Francisco, CA, USA). Raw thermograms were processed with MicroCal Origin® version 7.0 software (OriginLab™ Corporation) to obtain the binding parameters of each interaction. A 1:1 binding model was used for all interactions.

### Protein crystallisation, data collection and refinement

PDZ1, 2 and 3 domain proteins were mixed with wild-type Vangl2 peptide at a 1 : 20 molar excess to reconstitute the relevant complexes. Samples were subjected to crystallization screening in-house using a Gryphon nanodispenser (Art Robbins Instruments). PDZ1:Vangl2 crystals were obtained at 25 mg/ml in 0.1 M Phosphate/citrate pH 4.2 and 40% (v/v) PEG 300. Both PDZ2 and PDZ2–Vangl2 complex crystals were obtained at 15 mg/ml in 0.2 M Potassium thiocyanate and 20% (w/v) PEG 3350. PDZ3–Vangl2 crystals were obtained at 10 mg/ml in 0.1 M HEPES pH 7.8 and 66% (v/v) MPD.

## Diffraction data collection and structure determination

All crystals were flash cooled in mother liquor, the former supplemented with 20% (v/v) ethylene glycol (PDZ2–Vangl2 and PDZ1–Vangl2 crystals). All diffraction data were collected on the MX1 beamline at the Australian Synchrotron equipped with an ADSC Quantum 210r CCD detector (Area Detector Systems Corporation, Poway, California, USA) or the MX2 beamline equipped with the EIGER 16M detector. Diffraction data were integrated using *XDS* [28], followed by *AIMLESS* [29] for merging and scaling. The structure of the PDZ1–Vangl2 complex was solved by molecular replacement using *Phaser* [30] using the structure of Scribble PDZ1 (PDB code 6MTV [31]) as a search model. The structure of the PDZ3–Vangl2 complex was solved by molecular replacement using *Phaser* [30] using the structure of Scribble PDZ3 (PDB: 4WYT) as a search model. The structure of the PDZ2 domain on its own was also solved using the final model of the PDZ3–Vangl2 structure. The PDZ2–Vangl2 complex was then subsequently solved using the final model of the PDZ2 domain structure. The solutions produced by *Phaser* were manually rebuilt over multiple cycles using *Coot* [32] and refined using *PHENIX* [33]. All images were generated using the PyMOL Molecular Graphics System, Version 1.8 Schrödinger, LLC. All software was accessed using the SGrid suite [34].

## Circular dichroism spectroscopy

Proteins were buffer exchanged into 15 mM Na<sub>2</sub>HPO<sub>4</sub>/NaH<sub>2</sub>PO<sub>4</sub> buffer. Spectra were acquired at protein concentrations ranging from 0.080–0.150 mg/ml on an AVIV 420 CD spectrometer at 25°C. Wavelength scans were performed from 190 to 260 nm at 1 nm intervals and an averaging time of 4 s. Data were processed using the AVIV Biomedical software and displayed using Excel.

## Cell culture

MCF10A cells were cultured in Dulbecco's Modified Eagle Medium:F12 (DMEM:F12) supplemented with 5% donor horse serum (Gibco), 10 µg/ml insulin (Actrapid, Novo Nordisk Pharmaceuticals Ltd.), 0.5 µg/ml hydrocortisone (Merck), 20 ng/ml epidermal growth factor (Peprotech), 100 ng/ml cholera toxin (List Biological Laboratories Inc.), 100 units/ml penicillin, and 100 µg/ml streptomycin and maintained at 37°C in 5% CO<sub>2</sub>.

## Plasmid construct and viral transduction

Wild-type Vangl2 cDNA and Vangl2 cDNA missing the last four amino acids (ETSV) were cloned into MSCV vector using Gibson Assembly to generate N-terminally fused GFP-Vangl2 and GFP-Vangl2<sup>APBM</sup> expression constructs. Retroviral particles were produced by co-transfection of Hek293T cells with retroviral packaging plasmids and MSCV-based retroviral vectors expressing GFP-Vangl2, GFP-Vangl2<sup>APBM</sup> and the MSCV vector only and subsequently infecting low-passage MCF10A cells for stable expression. Infected cells were selected with 2 µg/ml puromycin for 1 week.

## GST pulldowns

GST-fusions of wild type and mutant Scribble PDZ domains were expressed and purified as described above. MCF10A cells were lysed in NETN lysis buffer (20 mM Tris-Cl, pH8.0; 100 mM NaCl; 1 mM EDTA; 0.5% Nonidet P-40) supplemented with a phosphatase inhibitor and protease inhibitor cocktail (Roche Diagnostics) for 10 min. An amount of 250 µg of MCF10A cell lysate and 5 µg of individual GST-tagged recombinant proteins were mixed and incubated with glutathione Sepharose 4b beads (GE Healthcare) at 4°C overnight. Beads were washed three times with NETN buffer prior to being eluted in loading buffer.

## Western blot

Eluted samples were resolved on standard sodium dodecyl sulphate-polyacrylamide gels and transferred to polyvinylidene difluoride membrane (Millipore). Membranes were blocked in 3% BSA in 0.2% Tween-20 in PBS for 1 h, then incubated with appropriate primary and secondary antibodies in blocking solution. Membranes were visualized using an Odyssey infrared imager (LiCor Biosciences). Antibodies used were rabbit polyclonal anti-GFP antibody (A-6455; Invitrogen); rabbit polyclonal anti-β-PIX antibody (4515S; Cell Signaling Technology) and rabbit polyclonal anti-GST antibody (71-7500; Invitrogen).

## Results

### Scribble PDZ domains show interactions with Vangl2

To understand the molecular basis for Scribble:Vangl2 interactions and its consequences on correct tissue development, in particular neural tube closure, we systematically examined interactions between individual Scribble PDZ domains with the C-terminal PBM of Vangl2 (RLQSETSV) using isothermal titration calorimetry. We unexpectedly found that Scribble PDZ1, 2 and 3 domains are able to all interact with the PBM of Vangl2, with affinities ranging from 24–45  $\mu$ M (Figure 1), whereas Scribble PDZ4 did not show any detectable affinity. As expected, a mutant Vangl2 peptide (RLQSEASA) did not show any binding to Scribble PDZ domains (Table 1). These findings are in contrast to previous data indicating that Scribble engages Vangl2 only via its PDZ2 and 3 domains [21,22]. Consequently, we performed pull-down assays using recombinant GST-fusions of Scribble PDZ1 to PDZ4 domains to examine binding of GFP-Vangl2 as well as  $\beta$ -PIX as a control. Whilst  $\beta$ -PIX bound to Scribble PDZ1 and PDZ3 as previously reported [25], we could also only detect binding of GFP-Vangl2 to PDZ2 and PDZ3 and this was dependent on the Vangl2 PBM (Figure 1).

### Crystal structures of PDZ2:Vangl2 and PDZ3-Vangl2 complexes

To understand the structural basis and the mode of interaction for Scribble PDZ domains with Vangl2, we determined crystal structures of Scribble PDZ1:Vangl2, PDZ2-Vangl2 and PDZ3-Vangl2 as well as Scribble PDZ2 on its own (Figure 2, Supplemental Table EVS1, Supplemental Figure EVS2). As expected, all Scribble PDZ domains adopt the typical PDZ domain fold comprising a six-stranded  $\beta$ -sheet with two  $\alpha$ -helices. All three Scribble PDZ domains comprise a compact globular fold featuring six  $\beta$ -strands and two  $\alpha$ -helices that adopt a  $\beta$ -sandwich structure. The overall mode of Vangl2 peptide engagement is conserved across all three PDZ domain complexes, with PDZ1, PDZ2 and PDZ3 engaging Vangl2 in a manner where the peptide is bound in an anti-parallel orientation compared to the second  $\beta$ -strand whilst being sandwiched by the  $\alpha$ 2 helix in the canonical binding pocket of the PDZ domains. A comparison of the PDZ1 and PDZ3 domain structures on their own with their Vangl2 complex counterparts revealed no significant movement of secondary structure elements upon Vangl2 binding, as previously observed in complexes of PDZ1 and PDZ3 with  $\beta$ -PIX [25] and PDZ1 complexes with APC [26] and MCC [31]. Similarly, superimposition of the Scribble PDZ2 domain structure with PDZ2:Vangl2 yielded an r.m.s.d of 0.453 Å over 73 C $\alpha$  atoms. A detailed examination of the Scribble PDZ1:Vangl2 complex (Figure 2A) reveals that Vangl2 forms a number of direct contacts with the PDZ1 domain. The C-terminal carboxyl group of Vangl2 makes contacts with the main chains of L738<sup>PDZ1</sup>, G739<sup>PDZ1</sup> and I740<sup>PDZ1</sup>, whilst the V521<sup>Vangl2</sup> side chain is accommodated in a hydrophobic pocket formed by L738<sup>PDZ1</sup>, I740<sup>PDZ1</sup>, I742<sup>PDZ1</sup>, V797<sup>PDZ1</sup> and L800<sup>PDZ1</sup>. Furthermore, hydrogen bonds between T519<sup>Vangl2</sup>:I742<sup>PDZ1</sup>, T519<sup>Vangl2</sup>:H793<sup>PDZ1</sup>, Q516<sup>Vangl2</sup>:T749<sup>PDZ1</sup>, E518<sup>Vangl2</sup>:S761<sup>PDZ1</sup>, E518<sup>Vangl2</sup>:R762<sup>PDZ1</sup> are observed. In the Scribble PDZ2:Vangl2 complex (Figure 2B), key features of the PDZ1:Vangl2 complex are conserved, with V521<sup>Vangl2</sup> being located in a pocket formed by L872<sup>PDZ2</sup>, F874<sup>PDZ2</sup>, I876<sup>PDZ2</sup>, V932<sup>PDZ2</sup> and L935<sup>PDZ2</sup>, whilst the C-terminal carboxyl group forms hydrogen bonds with the main chain of L872<sup>PDZ2</sup>, G873<sup>PDZ2</sup> and F874<sup>PDZ2</sup>. Additional interactions are formed by S520<sup>Vangl2</sup>:S875<sup>PDZ2</sup>, T519<sup>Vangl2</sup>:H928<sup>PDZ2</sup>, as well as a salt bridge between E518<sup>Vangl2</sup>:S895<sup>PDZ2</sup>. In the PDZ3:Vangl2 complex (Figure 2C), V521<sup>Vangl2</sup> is engaged by a hydrophobic pocket formed by L1014<sup>PDZ3</sup>, L1016<sup>PDZ3</sup>, I1018<sup>PDZ3</sup>, V1075<sup>PDZ3</sup> and L1079<sup>PDZ3</sup> with the V521<sup>Vangl2</sup> carboxyl group forming hydrogen bonds with the main chains of L1014<sup>PDZ3</sup>, G1015<sup>PDZ3</sup> and L1016<sup>PDZ3</sup>. Other contacts are formed by T519<sup>Vangl2</sup>:I1018<sup>PDZ3</sup>, S520<sup>Vangl2</sup>:S1017<sup>PDZ3</sup>, T519<sup>Vangl2</sup>:H1071<sup>PDZ3</sup>, and E518<sup>Vangl2</sup>:S1039<sup>PDZ3</sup>.

Whilst previous studies verified the mode of binding to Scribble PDZ1 and PDZ3 via mutagenesis [25,27], this has not been performed for Scribble PDZ2. Consequently, we generated a PDZ2 mutant where H928 was substituted by Ala (PDZ2H928A), which showed complete loss of binding to the Vangl2 PBM peptide (Figure 3). To validate our affinity measurements, we performed pull-down assays using recombinant GST-fusions of Scribble PDZ2 to GFP-Vangl2 and confirmed that PDZ2H928A could no longer bind to Vangl2 (Figure 3).

In view of the reported physical and genetic interaction of Scribble and Vangl2 and their proposed role in coordinating neural tube closure in mice and humans, we then examined the ability of reported neural tube closure point-mutants in Scribble PDZ domains on their ability to bind the PBM of Vangl2 using ITC (Figure 3). The mutations examined identified in human neural tube closure defects were PDZ1Q808H [35],

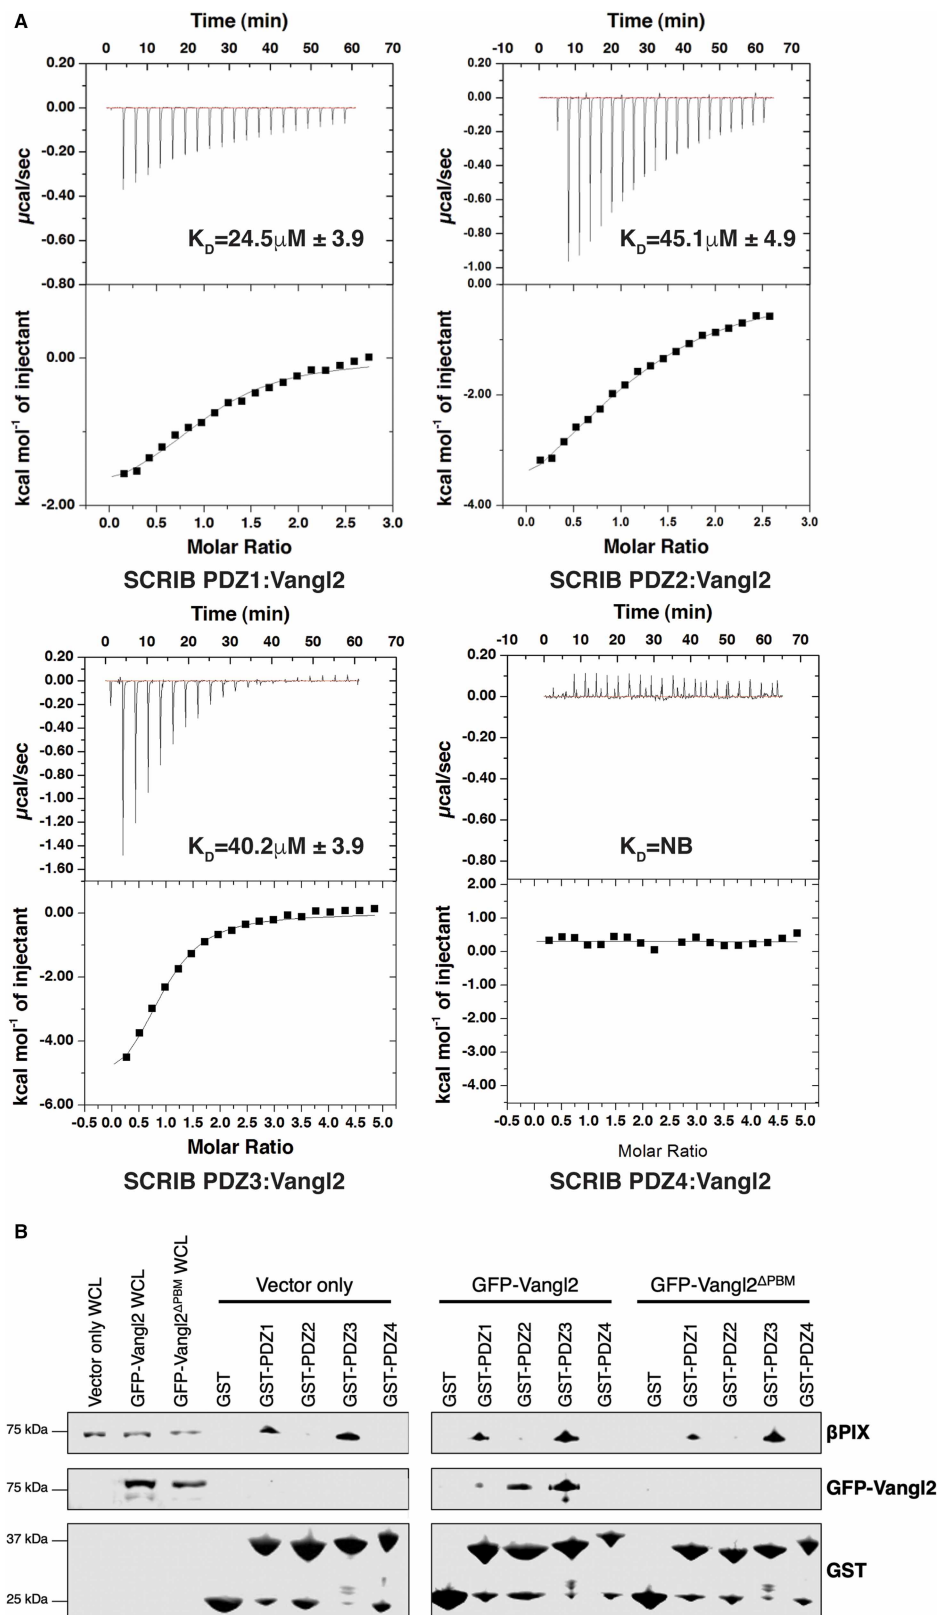

**Figure 1. Interactions of Scribble PDZ domains with Vangl2.**

Part 1 of 2

(A) Binding profiles of isolated Scribble PDZ domains interaction with Vangl2 peptides are displayed. Each profile is represented by a raw thermogram (top panel) and a binding isotherm fitted with a one-site binding model (bottom panels).  $K_D$ :

**Figure 1. Interactions of Scribble PDZ domains with Vangl2.**

Part 2 of 2

dissociation constant;  $\pm$ : standard deviation; NB: no binding. Each of the values was calculated from at least three independent experiments. (B) GST-tagged individual Scribble PDZ domains 1–4 incubated with MCF10A lysates stably expressing vector only, GFP-Vangl2 and GFP-Vangl2<sup>APBM</sup>. Bound proteins were recovered with glutathione resin and revealed by western transfer using anti-GFP and anti- $\beta$ -PIX antibodies.

PDZ3P1043L [14], and PDZ3R1044Q [36]. We also engineered the equivalent mutation to the mouse *scrib1* ENU mutant, *crn2* [37] into human PDZ1, as PDZ1E814G, and examined engineered mutants PDZ1H793A, PDZ2R896A and PDZ2H928A. Scribble mutants PDZ1E814G and PDZ3P1043L revealed a loss of binding to Vangl2, whereas PDZ1Q808H maintained an affinity comparable to the wild-type interaction. Furthermore, despite its close proximity to PDZ3P1043L, PDZ3R1044Q maintained an affinity comparable to the wild-type interaction indicating the specificity of the PDZ3P1043L mutation on ligand binding. To confirm that the loss of binding of certain Scribble mutants was not due to an unfolding defect, we confirmed that all Scribble mutants were folded using circular dichroism spectroscopy (Supplemental Figure EVS3). Furthermore, all mutants maintained the ability to bind a synthetic pan PDZ domain binding peptide referred to as superpeptide [27] that binds PDZ domains including those of Scribble with high affinity, suggesting that all mutants maintained a functional canonical ligand-binding groove that is capable of interacting with PDZ binding motif peptides. To determine whether or not the mutations in Scribble PDZ domain mutants were specific for Vangl2 or acted more broadly we examined the ability of PDZ1E814G, PDZ1Q808H, PDZ3P1043L and PDZ3R1044Q as well as our engineered mutants for other well-known Scribble interactors, such as  $\beta$ -Pix [25] and APC [26]. ITC measurements revealed that PDZ1E814G and PDZ3P1043L lost binding to both  $\beta$ -Pix and APC in addition to Vangl2. In contrast, PDZ1Q808H and PDZ3R1044Q bound interactors with affinities comparable to wild-type PDZ [25] and APC [26], with PDZ1Q808H binding  $\beta$ -Pix with 10.4  $\mu$ M, APC with 6.0  $\mu$ M and Vangl2 with 10.4  $\mu$ M, whereas PDZ3R1044Q bound  $\beta$ -Pix with 14.1  $\mu$ M, APC with 27.4  $\mu$ M and Vangl2 with 20.9  $\mu$ M. PDZ1H793A showed only a significant decrease in binding to  $\beta$ -Pix (62.77  $\mu$ M), whereas PDZ2R896A showed decreased affinity to  $\beta$ -Pix and APC compared to wild-type Scribble PDZ2 binding (189.24  $\mu$ M and 30.59  $\mu$ M, respectively). PDZ2H928A lost binding to all three interactors. To validate our affinity measurements we performed pull-down assays using recombinant GST-fusions of Scribble PDZ1 to

**Table 1 Summary of affinities of Vangl2,  $\beta$ -PIX, APC and superpeptide [27] peptides for WT and mutant Scrib PDZ domains measured at pH 7.5 and 25°C**

| SCRIB       | $K_D$ ( $\mu$ M) |            |                               |                               |                               |
|-------------|------------------|------------|-------------------------------|-------------------------------|-------------------------------|
|             | Vangl2           | mut Vangl2 | $\beta$ -PIX                  | APC                           | Superpeptide                  |
| PDZ1 WT     | 24.49 $\pm$ 3.90 | NB         | 3.33 $\pm$ 0.30 <sup>a</sup>  | 5.97 $\pm$ 1.10 <sup>b</sup>  | 0.72 $\pm$ 0.06 <sup>a</sup>  |
| PDZ1 H793A  | 29.94 $\pm$ 8.27 | n.d.       | 62.77 $\pm$ 22.43             | 18.80 $\pm$ 6.16 <sup>b</sup> | 2.18 $\pm$ 0.44               |
| PDZ1 Q808H  | 10.40 $\pm$ 0.27 | n.d.       | 3.11 $\pm$ 0.1                | 6.06 $\pm$ 0.65               | 2.73 $\pm$ 1.02               |
| PDZ1 E814G  | NB               | n.d.       | NB                            | NB                            | 2.36 $\pm$ 0.48               |
| PDZ2 WT     | 45.13 $\pm$ 4.92 | NB         | 67.84 $\pm$ 7.90 <sup>a</sup> | 35.94 $\pm$ 1.10 <sup>b</sup> | 4.42 $\pm$ 0.35 <sup>a</sup>  |
| PDZ2 R896A  | 26.74 $\pm$ 4.01 | n.d.       | 189.24 $\pm$ 24.89            | 30.59 $\pm$ 8.1               | 7.80 $\pm$ 4.0                |
| PDZ2 H928A  | NB               | n.d.       | NB                            | NB                            | 27.68 $\pm$ 8.4               |
| PDZ3 WT     | 40.16 $\pm$ 3.92 | NB         | 14.47 $\pm$ 2.09 <sup>a</sup> | 18.28 $\pm$ 3.33 <sup>b</sup> | 1.84 $\pm$ 0.77 <sup>a</sup>  |
| PDZ3 P1043L | NB               | n.d.       | NB                            | NB                            | 9.75 $\pm$ 3.90               |
| PDZ3 R1044Q | 20.93 $\pm$ 4.67 | n.d.       | 14.08 $\pm$ 3.43              | 27.43 $\pm$ 3.62              | 7.22 $\pm$ 3.22               |
| PDZ4 WT     | NB               | NB         | NB <sup>b</sup>               | NB <sup>b</sup>               | 25.85 $\pm$ 3.98 <sup>a</sup> |

NB denotes no binding, n.d. denotes not determined. Each of the values was calculated from at least three independent experiments. Values denoted by a and b were taken from [25] and [26], respectively.

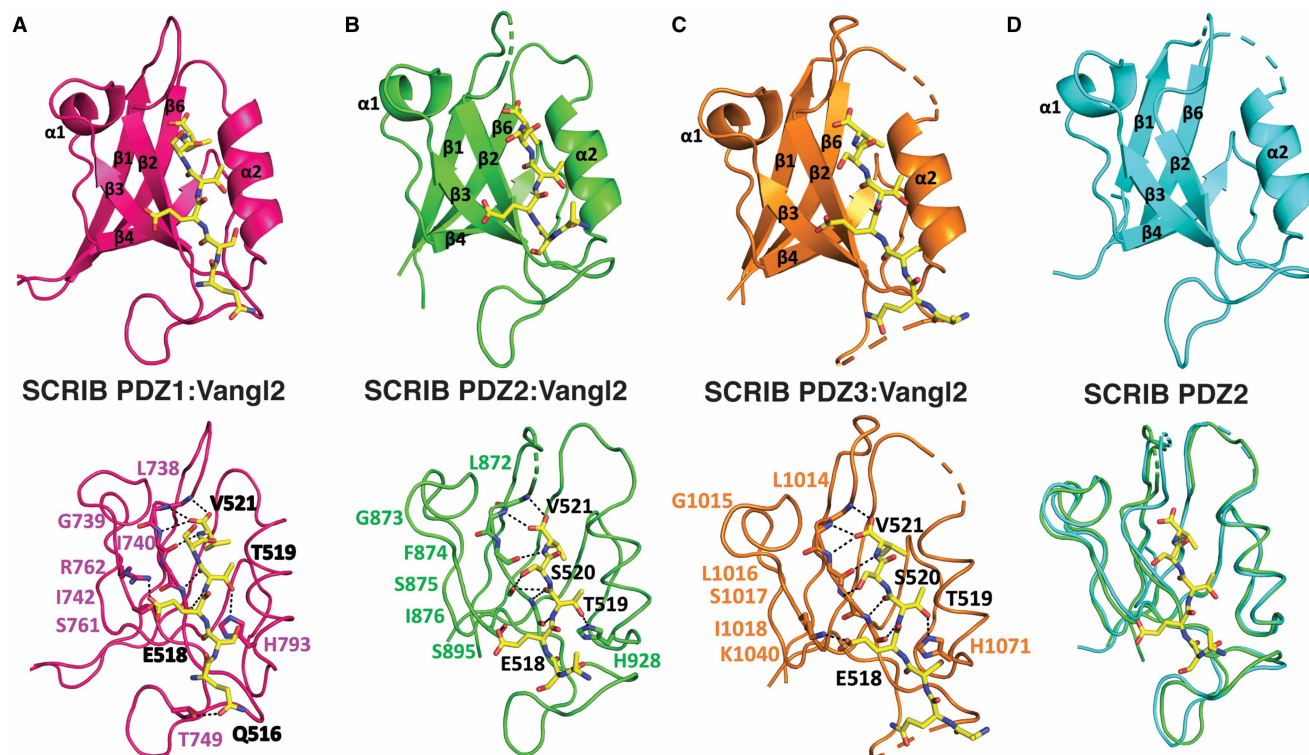

**Figure 2.** The crystal structures of PDZ1, PDZ2 and PDZ3 each bound to a Vangl2 peptide.

The Vangl2 peptide engages individual PDZ domains via a shallow groove located between the  $\beta 2$  and  $\alpha 2$ . (A) PDZ1 (magenta) is shown as a cartoon with Vangl2 peptide (yellow) represented as sticks. In the bottom panel, detailed interactions of Scribble PDZ1 with Vangl2 are shown as black dotted lines. Residues involved in these interactions are labeled. (B) PDZ2 (green) is shown as a cartoon with Vangl2 peptide (yellow) represented as sticks. In the bottom panel, detailed interactions of Scribble PDZ2 with Vangl2 are shown as black dotted lines. Residues involved in these interactions are labeled. (C) PDZ3 (orange) is shown as a cartoon with Vangl2 peptide (yellow) represented as sticks. In the bottom panel, detailed interactions of Scribble PDZ3 with Vangl2 are shown as black dotted lines. Residues involved in these interactions are labeled. (D) Ligand-free PDZ2 is shown as a cartoon (cyan). (E) Overlay of ribbon traces of PDZ2 with (green) and without Vangl2 peptide (cyan).

PDZ4 domains to examine binding of GFP-Vangl2 as well as  $\beta$ -PIX as a control (Figure 3E). We observed that PDZ3R1044Q, which displayed largely unchanged affinity to  $\beta$ -Pix, APC and Vangl2, was able to pull down  $\beta$ -Pix and Vangl2, similar to PDZ1Q808H. Other mutants including PDZ1E814G and PDZ3P1043L did not pull down either  $\beta$ -Pix or Vangl2. However, not all pull-down assays agreed with the measured affinities from ITC, with PDZ2R896A maintaining Vangl2 binding based on ITC but not in the pull-down assay.

## Discussion

Scribble is a large multi-domain scaffold protein that has been shown to play a pivotal role in cell polarity by integrating signaling from a multitude of interactors to control processes such as cell migration and wound healing. This is predominantly achieved via Scribble's four PDZ domains, which mediate the vast majority of Scribble interactions [8]. Whilst apicobasal cell polarity control is the most prominent of Scribble's function, Scribble also plays an important role in the establishment and control of planar cell polarity [12]. The importance of Scribble function on planar cell polarity is illustrated by the impact of specific point mutations in Scribble, which manifest themselves as major developmental defects such as neural tube closure defects and disruption in the cochlear inner ear hair bundle orientation [10,11]. Intriguingly, similar defects are observed for mutations in the transmembrane protein Vangl2, leading to the establishment of a genetic link between both proteins [11,16]. Although interactions between Scribble and Vangl2 have previously been shown to involve Scribble's PDZ2 and 3 domains, the detailed molecular and structural basis for these interactions remains to be clarified.

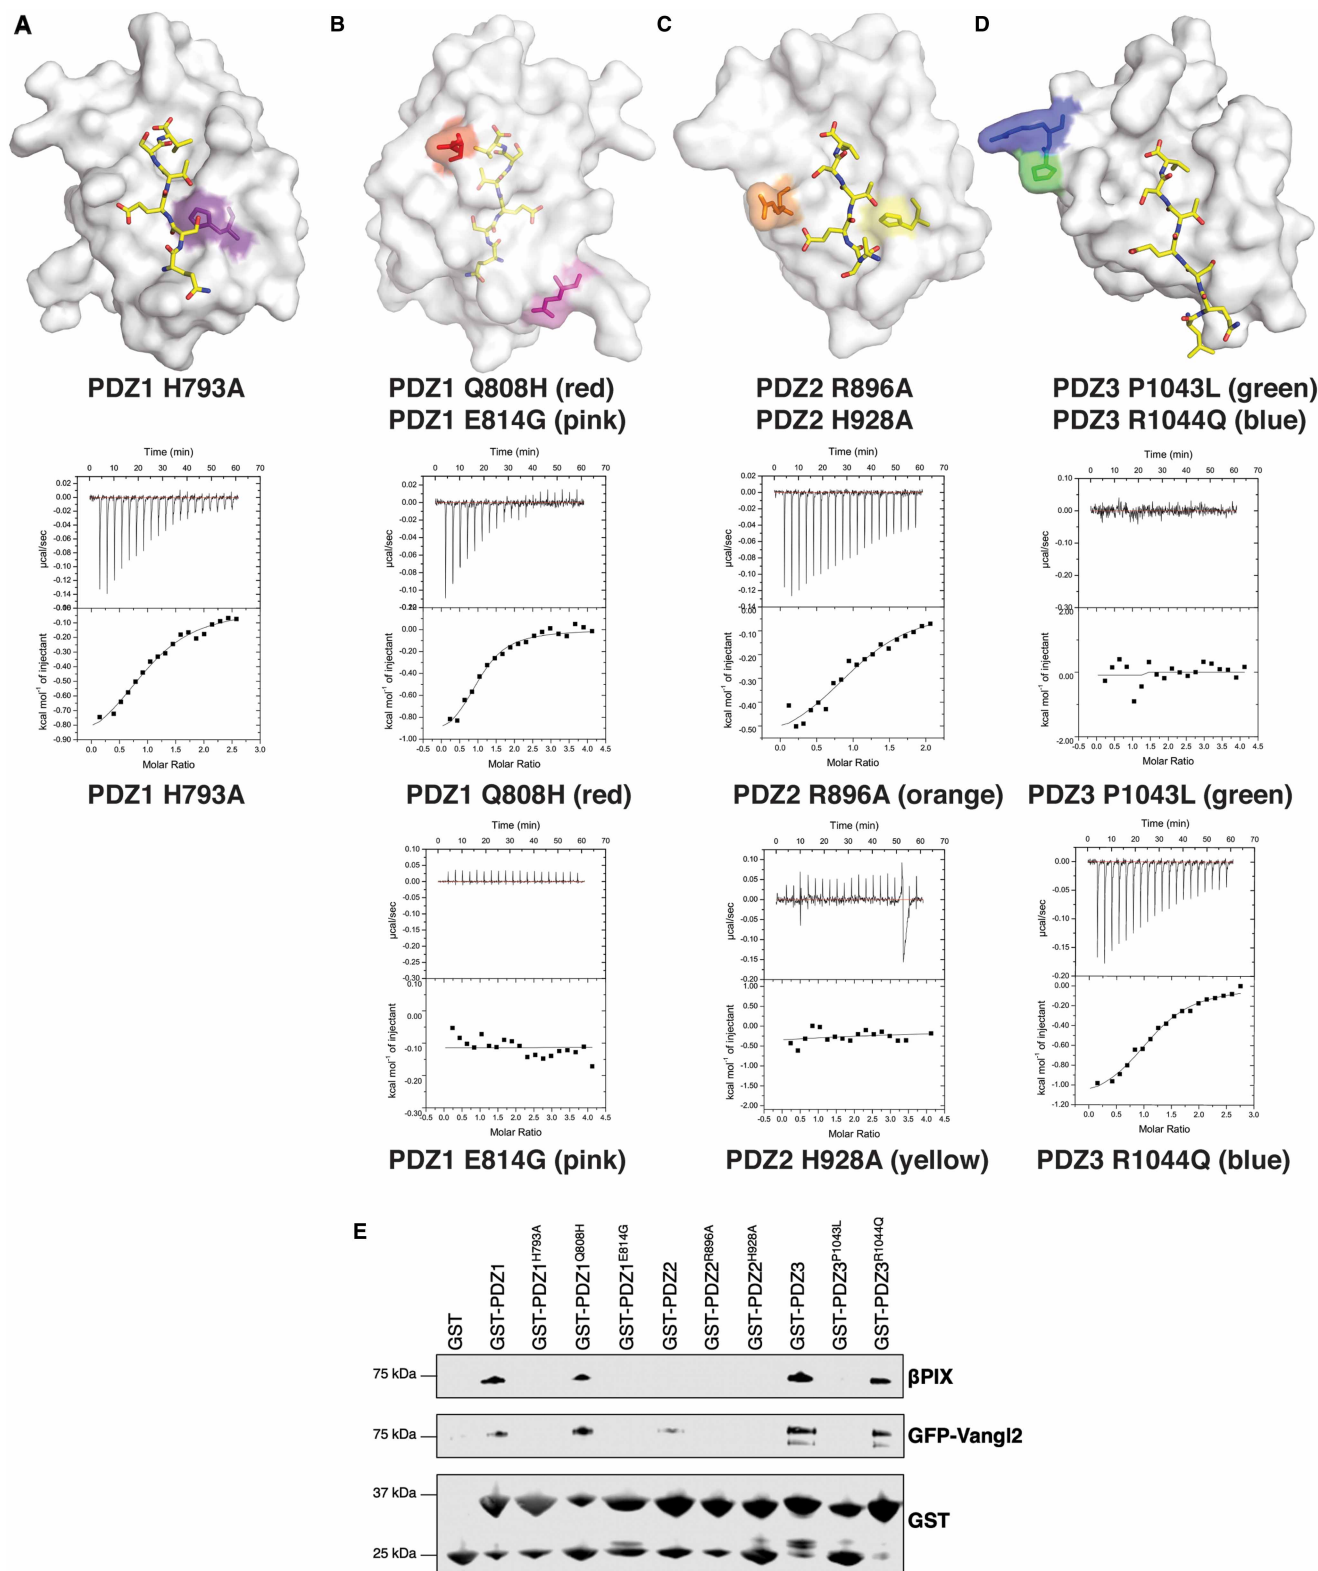

**Figure 3. Interaction profiles of mutant Scribble PDZ with Vangl2 peptides.**

Part 1 of 2

(A–D) Location of Scribble PDZ domain mutations used in this study. Mutated residues are colored on a gray surface representation of the relevant Scribble PDZ domain structure. Binding profiles of isolated mutant Scribble PDZ domain interactions with Vangl2 peptides. Each profile is represented by a raw thermogram (top panel) and a binding isotherm fitted with a one-site binding model (bottom panels).  $K_D$ : dissociation



**Figure 3. Interaction profiles of mutant Scribble PDZ with Vangl2 peptides.**

Part 2 of 2

constant;  $\pm$ : standard deviation; NB: no binding. Each of the values were calculated from at least three independent experiments. (E) GST-tagged Scribble PDZ domains, wildtype and with single-point mutations incubated with MCF10A cells stably expressing GFP-Vangl2. Bound proteins were recovered with glutathione resin and revealed by western transfer using anti-GST, anti- $\beta$ -PIX and anti-GFP antibodies.

We now show that in addition to the previously identified interactions of Scribble PDZ2 and 3 domains with the C-terminal PBM of Vangl2, Scribble's PDZ1 domain is also able to bind the Vangl2 PBM. Notably, affinities for all three interactions are comparable with a range of 24–45  $\mu$ M  $K_D$ , indicating that no distinct hierarchy in affinities exists for the Scribble:Vangl2 interactions. This is unusual in comparison with other Scribble interactions with e.g.  $\beta$ -PIX [25] or Gukh [27]. Whilst Scribble also binds  $\beta$ -PIX with its PDZ1, 2 and 3 domains, PDZ1 is the highest affinity interactor with a  $K_D$  of 3.3  $\mu$ M whereas PDZ2 is the lowest affinity site with a  $K_D$  of 67.8  $\mu$ M [25]. In contrast, Scribble engages tightly Gukh with its PDZ1 domain ( $K_D = 0.66 \mu$ M) whilst PDZ3 bound Gukh with only 27.8  $\mu$ M, with no binding detected with its PDZ2 and four domains [27].

To understand the structural basis of Scribble's PDZ domain interactions with the Vangl2 PBM, we determined complexes of Scribble PDZ1,2 and 3 domains with Vangl2. A comparison of the three PDZ domain complexes with Vangl2 reveals that whilst key family defining interactions are maintained and are near identical in all three including the engagement of the C-terminal Val (0) as well as the Thr in the  $-2$  position, other interactions vary and offer scope for distinguishing between the domains. A comparison of PDZ1:Vangl2 with other determined Scribble PDZ1 complexes indicates that specific patterns can be seen depending on the nature of the specific PBM that is bound. For example, residues at the  $-5$  position are shown to interact with the  $\beta 2$ – $\beta 3$  loop of PDZ1, whereas such interactions could not be observed in other Scribble PDZ domains. This behavior is also observed in *D. melanogaster*. This may be linked to the higher affinity of PDZ1 for its interactors compared to the other domains. A notable difference between PDZ1 and PDZ2 and 3 is that the latter utilized non-aromatic residues to engage the  $-5$  position of bound PBM sequences, which preclude  $\pi$ -stacking as observed in Scribble PDZ1- $\beta$ PIX [25] and *D.melanogaster* Scribble PDZ1-GukH [27]. This supports the notion that the  $\beta 2$ – $\beta 3$  loop is a significant modulator of Scribble PDZ1 domain binding affinities, which is supported by mutagenesis data where  $\beta 2$ – $\beta 3$  loop mutations reduce binding affinity [25].

With the availability of high-resolution structures of all key Scribble interacting domains with Vangl2, we revisited the previously identified mutations in Scribble that lead to neural tube closure defects. Mapping of these point mutants [12,38,39] indicates that in addition to mutations resulting in premature termination of Scribble, several mutations mapped to individual PDZ domains. Our analysis of these mutations using ITC revealed that although PDZ1Q808H, PDZ1E814G, PDZ3P1043L and PDZ3R1044Q are located distal from the canonical PDZ domain binding site, both PDZ1E814G and PDZ3P1043L are unable to bind to Vangl2 or indeed any other interactor tested including  $\beta$ -PIX and APC even though both mutants are folded, whereas PDZ1Q808H and PDZ3R1044Q displayed affinity that was comparable to the wild-type interaction. In contrast, a control mutant that mutated a key H928 residue in PDZ2 to Ala showed no binding. We note that a second engineered mutant, PDZ2R896A maintained binding to the Vangl2 PBM peptide when examined by ITC, but lost binding in pull-down assays with full-length Vangl2 as well as to  $\beta$ -PIX. Furthermore, whilst we were able to detect binding of the Vangl2 PBM peptide to Scrib PDZ1 and determine a crystal structure of the resultant complex, GST pull-down assays did not clearly detect this interaction as noted by others. This suggests that multiple factors may contribute to the interactions of Scribble PDZ domains with their interactors in addition to outright affinity, which impacts the ability to detect such interactions with a given approach. We also note that during pull-down assays, competitor interactors for Scrib are present that will impact the assay such as  $\beta$ -PIX, whose PBM binds with higher affinities than Vangl2 in ITC measurements.

The loss of binding of Vangl2 of two of the NTD associated mutants is intriguing when considering that both mutants were shown to be folded and able to bind to a synthetic high affinity interacting peptide. We speculate that these results are due to secondary shell or other distal changes that indirectly impact the canonical ligand-binding groove of PDZ domains, or affect PDZ domain stability in a manner that is not readily detectable by secondary structure changes and circular dichroism spectroscopy. An example for such a behavior was reported for the Tiam1 PDZ domain, which undergoes significant conformational changes on its secondary structures when interacting with different binding partners [40]. Importantly, NMR and molecular dynamics

**Table 2 mCSM analysis of Scribble disease mutants**

| SCRIB       | mCSM analysis                                  |                   |
|-------------|------------------------------------------------|-------------------|
|             | Predicted Affinity Change ( $\Delta\Delta G$ ) | Mutation category |
| PDZ1 Q808H  | 0.221 Kcal/mol                                 | Stabilizing       |
| PDZ1 E814G  | −0.766 Kcal/mol                                | Destabilizing     |
| PDZ3 P1043L | −0.391 Kcal/mol                                | Destabilizing     |
| PDZ3 R1044Q | −0.586 Kcal/mol                                | Destabilizing     |

approaches suggested that the  $\beta 1$ – $\beta 2$  and  $\beta 3$ – $\alpha 1$  regions are dynamically linked, thus providing for a mechanism where changes distal to the canonical ligand binding site of the TIAM1 PDZ domain modulate ligand binding and interactions. In addition, allosteric regulation on the surface [41] of Scribble PDZ domains may be affected by the mutations we examined. PDZ domains such as PDZ3 from PSD97/DLG4 have been shown to harbor sparse networks of coevolving amino acids, which when mutated may substantially impact ligand binding behavior [42,43]. Whilst comparable analyses to PSD97/DLG4 PDZ3 have not been performed for Scribble PDZ domains, considering that the networks of coevolving amino acids in PSD97/DLG4 are tightly linked to the structure and function of the PDZ domain it seems plausible that analogous networks may also be found in Scribble PDZ domains.

In order to gain further insight into the potential impact of specific mutations on Scribble PDZ domain structures and their interactions, we next examined the effect of these mutations using the mCSM server (Table 2) [44]. mCSM utilizes the Cutoff Scanning Matrix approach to describe protein structural signatures [45], and encodes distance patterns between atoms to represent protein residue environments. This allows the prediction of the impact of single-point mutations on protein stability and protein–protein interactions. Interestingly, an analysis of our Scribble PDZ domain structures revealed that PDZ1E814G, PDZ3P1043L and PDZ3R1044Q were all predicted to be destabilizing mutations that would result in a reduced affinity for an interactor, whereas PDZ1Q808H was predicted to be a stabilizing mutation with increased affinity for an interactor (Table 2). Nevertheless, the observed loss of binding of Scribble PDZ1E814G, PDZ3P1043L mutants allows the rationalization of the NTD phenotype, which would be due to a loss of binding to Vangl2. However, considering the loss of binding of PDZ1E814G and PDZ3P1043L for APC and  $\beta$ -PIX in addition to Vangl2 suggests that these mutations are not specific for Vangl2, and that the neural tube defect phenotype arises due to the substantial loss of interaction functionality of the affected Scribble PDZ domain. This would be consistent with the neural tube closure defect phenotype of mice with truncating mutations of Scribble with complete loss PDZ3 and PDZ4 (*crc*, 947fs mutation, [11,16]) although this mutation also destabilizes the Scribble protein itself [20,46].

In summary, we showed that biochemically Scribble is able to bind the Vangl2 PBM using its PDZ1,2 and 3 domains. Furthermore, we determined the structural basis for Vangl2 binding for all the interacting Scribble PDZ domains, and establish that well known NTD mutants of Scribble outside the canonical ligand-binding groove affect its PDZ domain ligand binding behavior, with mutant PDZ domains unable to engage a broad set of known Scribble interactors and not only Vangl2. Our findings raise the possibility that Scribble mutations associated with diseases such as NTDs are not disease causing due to loss of a single interaction, and instead support a view where a given mutation perturbs the overall interaction network of the adaptor protein Scribble by impacting multiple interactions and the dynamic interplay of different interactor with Scribble. Overall these findings form a mechanistic platform to understand how dysregulation of the Scribble interactions impacts planar cell polarity establishment, and may cause tissue disruption that manifests itself as neural tube closure defects.

### Data Availability

Coordinate files have been deposited in the Protein Data Bank under the accession code 6XA6, 6XA7, 6XA8 and 7JO7. Raw diffraction images were deposited on the SBGrid Data Bank [47] using their PDB accession numbers.

### Competing Interests

The authors declare that there are no competing interests associated with the manuscript.

## Funding

This work was supported in whole or part by the National Health and Medical Research Council Australia [Project Grant APP1103871 to M.K., P.O.H.; Senior Research Fellowship APP1079133 to P.O.H.], Australian Research Council [Fellowship FT130101349 to M.K.] and La Trobe University [Research Focus Area Understanding Disease grant 2000002510 and scholarships to J.Y.H., R.S. and K.Y.B.L.].

## Open Access Statement

Open access for this article was enabled by the participation of La Trobe University in an all-inclusive Read & Publish pilot with Portland Press and the Biochemical Society under a transformative agreement with CAUL.

## CRedit Contribution

**Marc Kvsanakul:** Conceptualization, Supervision, Funding acquisition, Investigation, Writing — original draft, Project administration, Writing — review and editing. **Jing Yuan How:** Investigation, Writing — original draft. **Rebecca Stephens:** Investigation, Writing — original draft. **Krystle Y.B. Lim:** Supervision, Investigation, Writing — review and editing. **Patrick O. Humbert:** Conceptualization, Supervision, Funding acquisition, Investigation, Writing — original draft, Project administration, Writing — review and editing.

## Acknowledgements

We thank staff at the MX beamlines at the Australian Synchrotron for help with X-ray data collection, and the CSIRO C3 Collaborative Crystallization Centre for assistance with crystallisation and the Comprehensive Proteomics Platform at La Trobe University for core instrument support. This research was undertaken in part using the MX2 beamline at the Australian Synchrotron, part of ANSTO, and made use of the ACRF detector.

## Abbreviations

PBMs, PDZ-binding motifs; PDZ, PSD-95/Discs-large/ZO-1.

## References

- 1 Nelson, W.J. (2003) Adaptation of core mechanisms to generate cell polarity. *Nature* **422**, 766–774 <https://doi.org/10.1038/nature01602>
- 2 Dow, L.E. and Humbert, P.O. (2007) Polarity regulators and the control of epithelial architecture, cell migration, and tumorigenesis. *Int. Rev. Cytol.* **262**, 253–302 [https://doi.org/10.1016/S0074-7696\(07\)62006-3](https://doi.org/10.1016/S0074-7696(07)62006-3)
- 3 Butler, M.T. and Wallingford, J.B. (2017) Planar cell polarity in development and disease. *Nat. Rev. Mol. Cell Biol.* **18**, 375–388 <https://doi.org/10.1038/nrm.2017.11>
- 4 Nikolopoulou, E., Galea, G.L., Rolo, A., Greene, N.D. and Copp, A.J. (2017) Neural tube closure: cellular, molecular and biomechanical mechanisms. *Development* **144**, 552–566 <https://doi.org/10.1242/dev.145904>
- 5 Munoz-Soriano, V., Belacortu, Y. and Paricio, N. (2012) Planar cell polarity signaling in collective cell movements during morphogenesis and disease. *Curr. Genomics* **13**, 609–622 <https://doi.org/10.2174/138920212803759721>
- 6 Bonello, T.T. and Peifer, M. (2019) Scribble: a master scaffold in polarity, adhesion, synaptogenesis, and proliferation. *J. Cell Biol.* **218**, 742–756 <https://doi.org/10.1083/jcb.201810103>
- 7 Santoni, M.J., Kashyap, R., Camoin, L. and Borg, J.P. (2020) The Scribble family in cancer: twentieth anniversary. *Oncogene* **39**, 7019–7033 <https://doi.org/10.1038/s41388-020-01478-7>
- 8 Stephens, R., Lim, K., Portela, M., Kvsanakul, M., Humbert, P.O. and Richardson, H.E. (2018) The Scribble cell polarity module in the regulation of cell signaling in tissue development and tumorigenesis. *J. Mol. Biol.* **430**, 3585–3612 <https://doi.org/10.1016/j.jmb.2018.01.011>
- 9 Bilder, D., Li, M. and Perrimon, N. (2000) Cooperative regulation of cell polarity and growth by Drosophila tumor suppressors. *Science* **289**, 113–116 <https://doi.org/10.1126/science.289.5476.113>
- 10 Montcouquiol, M., Rachel, R.A., Lanford, P.J., Copeland, N.G., Jenkins, N.A. and Kelley, M.W. (2003) Identification of Vangl2 and Scrb1 as planar polarity genes in mammals. *Nature* **423**, 173–177 <https://doi.org/10.1038/nature01618>
- 11 Murdoch, J.N., Henderson, D.J., Doudney, K., Gaston-Massuet, C., Phillips, H.M., Paternotte, C. et al. (2003) Disruption of scribble (Scrb1) causes severe neural tube defects in the circletail mouse. *Hum. Mol. Genet.* **12**, 87–98 <https://doi.org/10.1093/hmg/ddg014>
- 12 Milgrom-Hoffman, M. and Humbert, P.O. (2018) Regulation of cellular and PCP signalling by the Scribble polarity module. *Semin. Cell Dev. Biol.* **81**, 33–45 <https://doi.org/10.1016/j.semcdb.2017.11.021>
- 13 Robinson, A., Escuin, S., Doudney, K., Vekemans, M., Stevenson, R.E., Greene, N.D. et al. (2012) Mutations in the planar cell polarity genes CELSR1 and SCRIB are associated with the severe neural tube defect craniorachischisis. *Hum. Mutat.* **33**, 440–447 <https://doi.org/10.1002/humu.21662>
- 14 Lei, Y., Zhu, H., Duhon, C., Yang, W., Ross, M.E., Shaw, G.M. et al. (2013) Mutations in planar cell polarity gene SCRIB are associated with spina bifida. *PLoS ONE* **8**, e69262 <https://doi.org/10.1371/journal.pone.0069262>
- 15 Bailly, E., Walton, A. and Borg, J.P. (2018) The planar cell polarity Vangl2 protein: From genetics to cellular and molecular functions. *Semin. Cell Dev. Biol.* **81**, 62–70 <https://doi.org/10.1016/j.semcdb.2017.10.030>
- 16 Murdoch, J.N., Doudney, K., Paternotte, C., Copp, A.J. and Stanier, P. (2001) Severe neural tube defects in the loop-tail mouse result from mutation of Lpp1, a novel gene involved in floor plate specification. *Hum. Mol. Genet.* **10**, 2593–2601 <https://doi.org/10.1093/hmg/10.22.2593>

- 17 Kibar, Z., Salem, S., Bosoi, C.M., Pauwels, E., De Marco, P., Merello, E. et al. (2011) Contribution of VANGL2 mutations to isolated neural tube defects. *Clin. Genet.* **80**, 76–82 <https://doi.org/10.1111/j.1399-0004.2010.01515.x>
- 18 Humphries, A.C., Narang, S. and Mlodzik, M. (2020) Mutations associated with human neural tube defects display disrupted planar cell polarity in *Drosophila*. *eLife* **9**, e53532 <https://doi.org/10.7554/eLife.53532>
- 19 Phillips, H.M., Rhee, H.J., Murdoch, J.N., Hildreth, V., Peat, J.D., Anderson, R.H. et al. (2007) Disruption of planar cell polarity signaling results in congenital heart defects and cardiomyopathy attributable to early cardiomyocyte disorganization. *Circ. Res.* **101**, 137–145 <https://doi.org/10.1161/CIRCRESAHA.106.142406>
- 20 Yates, L.L., Schnatwinkel, C., Hazelwood, L., Chessum, L., Paudyal, A., Hilton, H. et al. (2013) Scribble is required for normal epithelial cell-cell contacts and lumen morphogenesis in the mammalian lung. *Dev. Biol.* **373**, 267–280 <https://doi.org/10.1016/j.ydbio.2012.11.012>
- 21 Kallay, L.M., McNickle, A., Brennwald, P.J., Hubbard, A.L. and Braiterman, L.T. (2006) Scribble associates with two polarity proteins, Lgl2 and Vangl2, via distinct molecular domains. *J. Cell. Biochem.* **99**, 647–664 <https://doi.org/10.1002/jcb.20992>
- 22 Montcouquiol, M., Sans, N., Huss, D., Kach, J., Dickman, J.D., Forge, A. et al. (2006) Asymmetric localization of Vangl2 and Fz3 indicate novel mechanisms for planar cell polarity in mammals. *J. Neurosci.* **26**, 5265–5275 <https://doi.org/10.1523/JNEUROSCI.4680-05.2006>
- 23 Navajas Acedo, J., Voas, M.G., Alexander, R., Woolley, T., Unruh, J.R., Li, H. et al. (2019) PCP and Wnt pathway components act in parallel during zebrafish mechanosensory hair cell orientation. *Nat. Commun.* **10**, 3993 <https://doi.org/10.1038/s41467-019-12005-y>
- 24 Rautureau, G.J., Yabal, M., Yang, H., Huang, D.C., Kvsanskul, M. and Hinds, M.G. (2012) The restricted binding repertoire of Bcl-B leaves Bim as the universal BH3-only prosurvival Bcl-2 protein antagonist. *Cell Death Dis.* **3**, e443 <https://doi.org/10.1038/cddis.2012.178>
- 25 Lim, K.Y.B., Godde, N.J., Humbert, P.O. and Kvsanskul, M. (2017) Structural basis for the differential interaction of Scribble PDZ domains with the guanine nucleotide exchange factor beta-PIX. *J. Biol. Chem.* **292**, 20425–20436 <https://doi.org/10.1074/jbc.M117.799452>
- 26 How, J.Y., Caria, S., Humbert, P.O. and Kvsanskul, M. (2019) Crystal structure of the human Scribble PDZ1 domain bound to the PDZ-binding motif of APC. *FEBS Lett.* **593**, 533–542 <https://doi.org/10.1002/1873-3468.13329>
- 27 Caria, S., Magtoto, C.M., Samiei, T., Portela, M., Lim, K.Y.B., How, J.Y. et al. (2018) *Drosophila melanogaster* Guk-holder interacts with the Scribbled PDZ1 domain and regulates epithelial development with Scribbled and Discs Large. *J. Biol. Chem.* **293**, 4519–4531 <https://doi.org/10.1074/jbc.M117.817528>
- 28 Kabsch, W. (2010) Xds. *Acta Crystallogr. D Biol. Crystallogr.* **66**, 125–132 <https://doi.org/10.1107/S0907444909047337>
- 29 Winn, M.D., Ballard, C.C., Cowtan, K.D., Dodson, E.J., Emsley, P., Evans, P.R. et al. (2011) Overview of the CCP4 suite and current developments. *Acta Crystallogr. D Biol. Crystallogr.* **67**, 235–242 <https://doi.org/10.1107/S0907444910045749>
- 30 McCoy, A.J. (2007) Solving structures of protein complexes by molecular replacement with Phaser. *Acta Crystallogr. D Biol. Crystallogr.* **63**, 32–41 <https://doi.org/10.1107/S0907444906045975>
- 31 Caria, S., Stewart, B.Z., Jin, R., Smith, B.J., Humbert, P.O. and Kvsanskul, M. (2019) Structural analysis of phosphorylation-associated interactions of human MCC with scribble PDZ domains. *FEBS J.* **286**, 4910–4925 <https://doi.org/10.1111/febs.15002>
- 32 Emsley, P. and Cowtan, K. (2004) Coot: model-building tools for molecular graphics. *Acta Crystallogr. D Biol. Crystallogr.* **60**, 2126–2132 <https://doi.org/10.1107/S0907444904019158>
- 33 Afonine, P.V., Grosse-Kunstleve, R.W., Echols, N., Headd, J.J., Moriarty, N.W., Mustyakimov, M. et al. (2012) Towards automated crystallographic structure refinement with phenix.refine. *Acta Crystallogr. D Biol. Crystallogr.* **68**, 352–367 <https://doi.org/10.1107/S0907444912001308>
- 34 Morin, A., Eisenbraun, B., Key, J., Sanschagrin, P.C., Timony, M.A., Ottaviano, M. et al. (2013) Collaboration gets the most out of software. *eLife* **2**, e01456 <https://doi.org/10.7554/eLife.01456>
- 35 Kharfallah, F., Guyot, M.C., El Hassan, A.R., Allache, R., Merello, E., De Marco, P. et al. (2017) Scribble1 plays an important role in the pathogenesis of neural tube defects through its mediating effect of Par-3 and Vangl1/2 localization. *Hum. Mol. Genet.* **26**, 2307–2320 <https://doi.org/10.1093/hmg/ddx122>
- 36 Wang, L., Xiao, Y., Tian, T., Jin, L., Lei, Y., Finnell, R.H. et al. (2018) Digenic variants of planar cell polarity genes in human neural tube defect patients. *Mol. Genet. Metab.* **124**, 94–100 <https://doi.org/10.1016/j.ymgme.2018.03.005>
- 37 Stottmann, R.W., Moran, J.L., Turbe-Doan, A., Driver, E., Kelley, M. and Beier, D.R. (2011) Focusing forward genetics: a tripartite ENU screen for neurodevelopmental mutations in the mouse. *Genetics* **188**, 615–624 <https://doi.org/10.1534/genetics.111.126862>
- 38 Humbert, P.O., Grzeschik, N.A., Brumby, A.M., Galea, R., Emsum, I. and Richardson, H.E. (2008) Control of tumorigenesis by the Scribble/Dlg/Lgl polarity module. *Oncogene* **27**, 6888–6907 <https://doi.org/10.1038/onc.2008.341>
- 39 Emsum, I., Yates, L., Humbert, P.O. and Richardson, H.E. (2012) The Scribble-Dlg-Lgl polarity module in development and cancer: from flies to man. *Essays Biochem.* **53**, 141–168 <https://doi.org/10.1042/bse0530141>
- 40 Liu, X., Shepherd, T.R., Murray, A.M., Xu, Z. and Fuentes, E.J. (2013) The structure of the Tiam1 PDZ domain/ phospho-syndecan1 complex reveals a ligand conformation that modulates protein dynamics. *Structure* **21**, 342–354 <https://doi.org/10.1016/j.str.2013.01.004>
- 41 Reynolds, K.A., McLaughlin, R.N. and Ranganathan, R. (2011) Hot spots for allosteric regulation on protein surfaces. *Cell* **147**, 1564–1575 <https://doi.org/10.1016/j.cell.2011.10.049>
- 42 Chi, C.N., Elfstrom, L., Shi, Y., Snall, T., Engstrom, A. and Jemth, P. (2008) Reassessing a sparse energetic network within a single protein domain. *Proc. Natl Acad. Sci. U.S.A.* **105**, 4679–4684 <https://doi.org/10.1073/pnas.0711732105>
- 43 McLaughlin RN, J., Poelwijk, F.J., Raman, A., Gosal, W.S. and Ranganathan, R. (2012) The spatial architecture of protein function and adaptation. *Nature* **491**, 138–142 <https://doi.org/10.1038/nature11500>
- 44 Pires, D.E., Ascher, D.B. and Blundell, T.L. (2014) mCSM: predicting the effects of mutations in proteins using graph-based signatures. *Bioinformatics* **30**, 335–342 <https://doi.org/10.1093/bioinformatics/btt691>
- 45 Pires, D.E., de Melo-Minardi, R.C., dos Santos, M.A., da Silveira, C.H., Santoro, M.M. and Meira, Jr, W. (2011) Cutoff Scanning Matrix (CSM): structural classification and function prediction by protein inter-residue distance patterns. *BMC Genomics* **12**, S12 <https://doi.org/10.1186/1471-2164-12-S4-S12>
- 46 Moreau, M.M., Piguél, N., Papouin, T., Koehl, M., Durand, C.M., Rubio, M.E. et al. (2010) The planar polarity protein Scribble1 is essential for neuronal plasticity and brain function. *J. Neurosci.* **30**, 9738–9752 <https://doi.org/10.1523/JNEUROSCI.6007-09.2010>
- 47 Meyer, P.A., Socias, S., Key, J., Ransey, E., Tjon, E.C., Buschiazio, A., et al. (2016) Data publication with the structural biology data grid supports live analysis. *Nat. Commun.* **7**, 10882 <https://doi.org/10.1038/ncomms10882>
